# Supplementary material for: In vivo microscopy reveals macrophage polarization locally promotes coherent microtubule dynamics in migrating cancer cells
Source: PubMed Central journal article supplement (PMC7360550; doi:10.1038/s41467-020-17147-y), 2020-07-14
Supplement: 41467_2020_17147_MOESM2_ESM.pdf [file 41467_2020_17147_MOESM2_ESM.pdf]

## **Description of Additional Supplementary Files**

File Name: Supplementary Movie 1

Description: Intravital microscopy and computational tracking of MT tracks in HT1080-EB3-mApple xenograft tumors.

File Name: Supplementary Movie 2

Description: Intravital microscopy and computational tracking of MT tracks in HT1080-EB3-mApple xenograft tumor treated with aLL10R and corresponds to Fig. 9.
